# Supplementary material for: On electrochemistry of metal–organic framework Zn2(EDTA)(H2O)
Source: Royal Society of Chemistry journal article supplement (doi:10.1039/d3ra00040k), 2023-01-01
Supplement: d3ra00040k1.pdf [file d3ra00040k1.pdf]

## Supplementary information for: On electrochemistry of metal-organic framework $Zn_2(EDTA)(H_2O)$

A. A. Starodubtseva<sup>1</sup>, Y.S. Zhigalenok<sup>1</sup>, K. M. Maldybaev<sup>1</sup>, A.K. Galeyeva<sup>1</sup>, I.A. Trussov<sup>1,2\*</sup>,  
A.P. Kurbatov<sup>1</sup>

<sup>1</sup>Center of Physico-Chemical Methods of Research and Analysis, al-Farabi Kazakh National  
University, Almaty, 010000, Kazakhstan

<sup>2</sup>Skoltech Center for Electrochemical Energy Storage, Skolkovo Institute of Science and  
Technology, Moscow, 121205, Russian Federation

Table 1S. The list of experiments on ZnMOF synthesis conducted in the work.

| Reagents                                                                   | Synthesis conditions |       |      |       | W, % | Note                                                                        |
|----------------------------------------------------------------------------|----------------------|-------|------|-------|------|-----------------------------------------------------------------------------|
|                                                                            | C, M                 | T, °C | t, h | pH    |      |                                                                             |
| ZnCl <sub>2</sub><br>Na <sub>2</sub> H <sub>2</sub> EDTA×2H <sub>2</sub> O | 0,085<br>0,085       | 200   | 18   | 3-3.4 | 0    | no solid phase, the presence of a resinous organic phase                    |
| ZnCl <sub>2</sub><br>Na <sub>2</sub> H <sub>2</sub> EDTA×2H <sub>2</sub> O | 0,085<br>0,085       | 200   | 24   | 3-3.4 | 0    | no solid phase, the presence of a resinous organic phase                    |
| ZnCl <sub>2</sub><br>Na <sub>2</sub> H <sub>2</sub> EDTA×2H <sub>2</sub> O | 0,085<br>0,085       | 200   | 48   | 3-3.4 | 34   | the presence of a resinous organic phase, particle size of ~27 μm is formed |
| ZnCl <sub>2</sub><br>Na <sub>2</sub> H <sub>2</sub> EDTA×2H <sub>2</sub> O | 0,085<br>0,085       | 200   | 72   | 3-3.4 | 63   | the presence of a resinous organic phase, particle size of ~65 μm is formed |
| ZnCl <sub>2</sub><br>Na <sub>2</sub> H <sub>2</sub> EDTA×2H <sub>2</sub> O | 0,085<br>0,085       | 200   | 96   | 3-3.4 | 67   | the presence of a resinous organic phase, particle size of ~74 μm is formed |
| ZnCl <sub>2</sub><br>Na <sub>2</sub> H <sub>2</sub> EDTA×2H <sub>2</sub> O | 0,085<br>0,085       | 100   | 72   | 3-3.4 | 0    | no solid phase                                                              |
| ZnCl <sub>2</sub><br>Na <sub>2</sub> H <sub>2</sub> EDTA×2H <sub>2</sub> O | 0,085<br>0,085       | 120   | 72   | 3-3.4 | 0    | no solid phase                                                              |
| ZnCl <sub>2</sub><br>Na <sub>2</sub> H <sub>2</sub> EDTA×2H <sub>2</sub> O | 0,085<br>0,085       | 160   | 72   | 3-3.4 | 0    | no solid phase                                                              |
| ZnCl <sub>2</sub><br>Na <sub>2</sub> H <sub>2</sub> EDTA×2H <sub>2</sub> O | 0,085<br>0,085       | 170   | 72   | 3-3.4 | 60   | particle size of ~39 μm is formed, no organic phase                         |
| ZnCl <sub>2</sub><br>Na <sub>2</sub> H <sub>2</sub> EDTA×2H <sub>2</sub> O | 0,085<br>0,085       | 180   | 72   | 3-3.4 | 71   | particle size of ~42 μm is formed, no organic phase                         |
| ZnCl <sub>2</sub><br>Na <sub>2</sub> H <sub>2</sub> EDTA×2H <sub>2</sub> O | 0,085<br>0,085       | 190   | 72   | 3-3.4 | 67   | the presence of a resinous organic phase, particle size of ~55 μm is formed |
| ZnCl <sub>2</sub><br>Na <sub>2</sub> H <sub>2</sub> EDTA×2H <sub>2</sub> O | 0,085<br>0,085       | 210   | 72   | 3-3.4 | 0    | no solid phase, the presence of a resinous organic phase                    |
| ZnCl <sub>2</sub><br>Na <sub>2</sub> H <sub>2</sub> EDTA×2H <sub>2</sub> O | 0,085<br>0,085       | 220   | 72   | 3-3.4 | 0    | no solid phase, the presence of a resinous organic phase                    |
| ZnCl <sub>2</sub><br>Na <sub>2</sub> H <sub>2</sub> EDTA×2H <sub>2</sub> O | 0,085<br>0,085       | 180   | 72   | 1.6   | 0    | no solid phase, not used KOH                                                |

|                                                                            |                |     |    |       |    |                                                                                                                                 |
|----------------------------------------------------------------------------|----------------|-----|----|-------|----|---------------------------------------------------------------------------------------------------------------------------------|
| ZnCl <sub>2</sub><br>Na <sub>2</sub> H <sub>2</sub> EDTA×2H <sub>2</sub> O | 0,085<br>0,085 | 180 | 72 | 2.5   | 0  | no solid phase, before the synthesis, there is no complete dissolution of Na <sub>2</sub> H <sub>2</sub> EDTA×2H <sub>2</sub> O |
| ZnCl <sub>2</sub><br>Na <sub>2</sub> H <sub>2</sub> EDTA×2H <sub>2</sub> O | 0,085<br>0,085 | 180 | 72 | 5.4   | 0  | no solid phase, before the start of synthesis, the appearance of blue flakes Zn(OH) <sub>2</sub>                                |
| ZnCl <sub>2</sub><br>Na <sub>2</sub> H <sub>2</sub> EDTA×2H <sub>2</sub> O | 0,17<br>0,17   | 180 | 72 | 3-3.4 | 73 | particle size of ~62 μm is formed, no organic phase                                                                             |
| ZnCl <sub>2</sub><br>Na <sub>2</sub> H <sub>2</sub> EDTA×2H <sub>2</sub> O | 0,34<br>0,34   | 180 | 72 | 3-3.4 | 70 | particle size of ~75 μm is formed, the presence of a resinous organic phase                                                     |

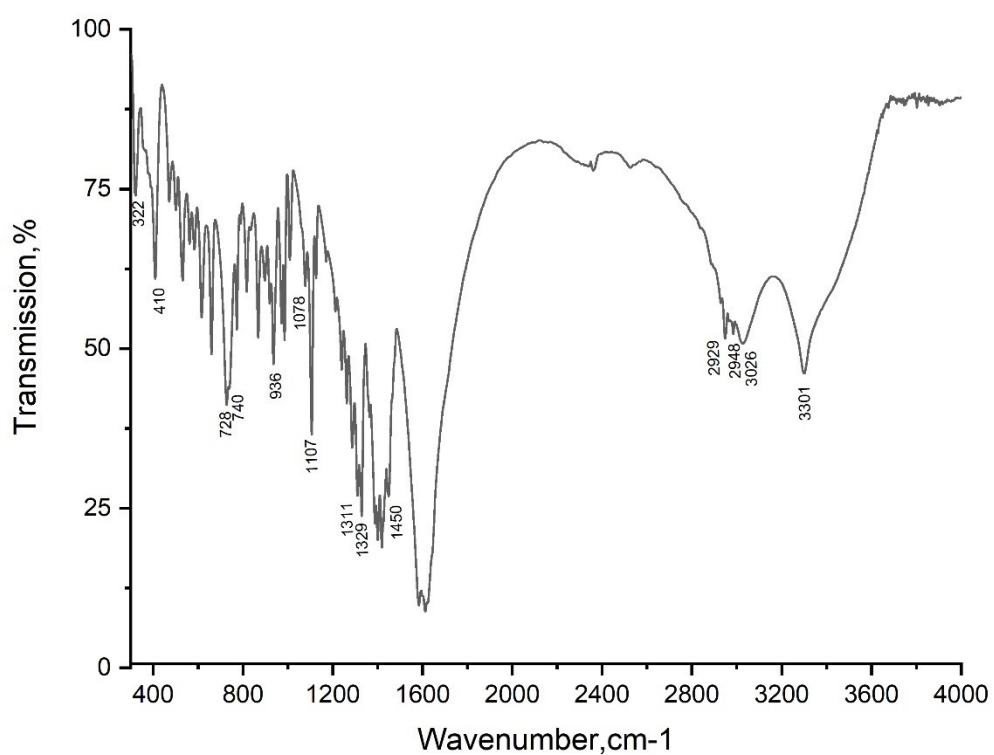

Figure S1- Infrared spectrum of Zn<sub>2</sub>(EDTA)H<sub>2</sub>O

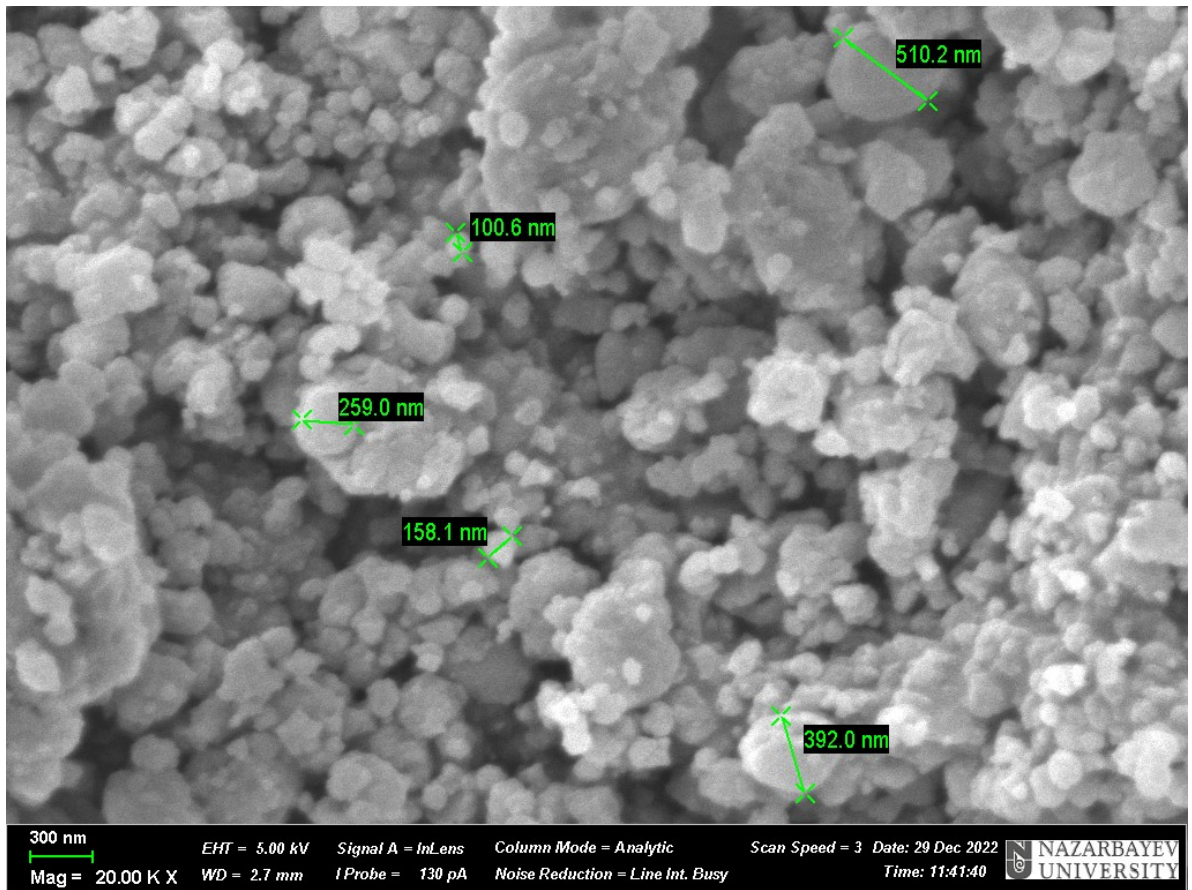

Figure S2 - SEM images of Zn<sub>2</sub>(EDTA)H<sub>2</sub>O sample after ball-milling with sizes.

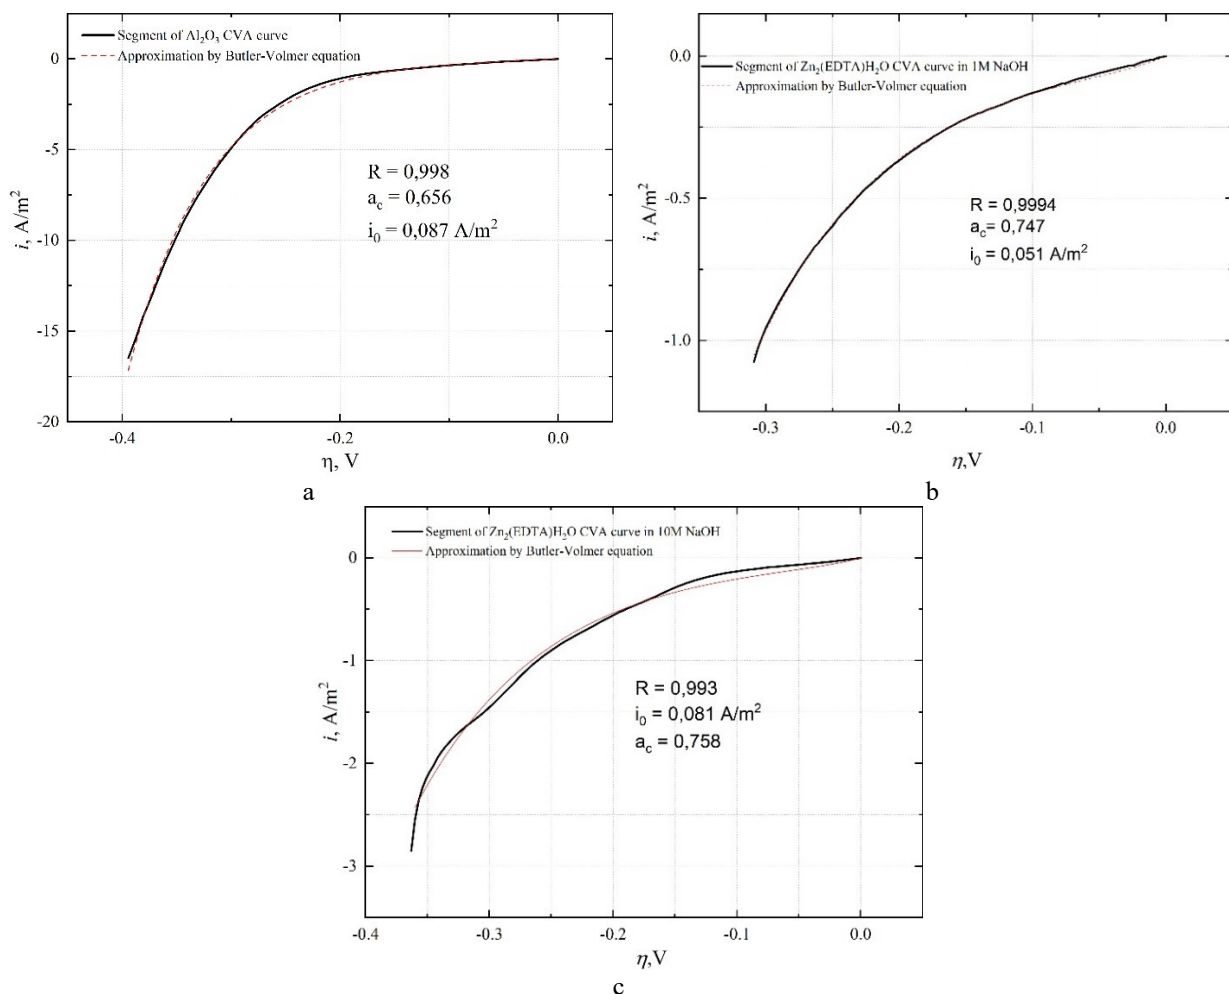

Figure S3 - sections of cyclic voltammograms interpolated by the Butler-Volmer equation, a) an electrode based on  $\text{Al}_2\text{O}_3$  in 1M NaOH; b) an electrode based on  $\text{Zn}_2(\text{EDTA})\text{H}_2\text{O}$  in 1M NaOH; c) electrode based on  $\text{Zn}_2(\text{EDTA})\text{H}_2\text{O}$  in 10M NaOH

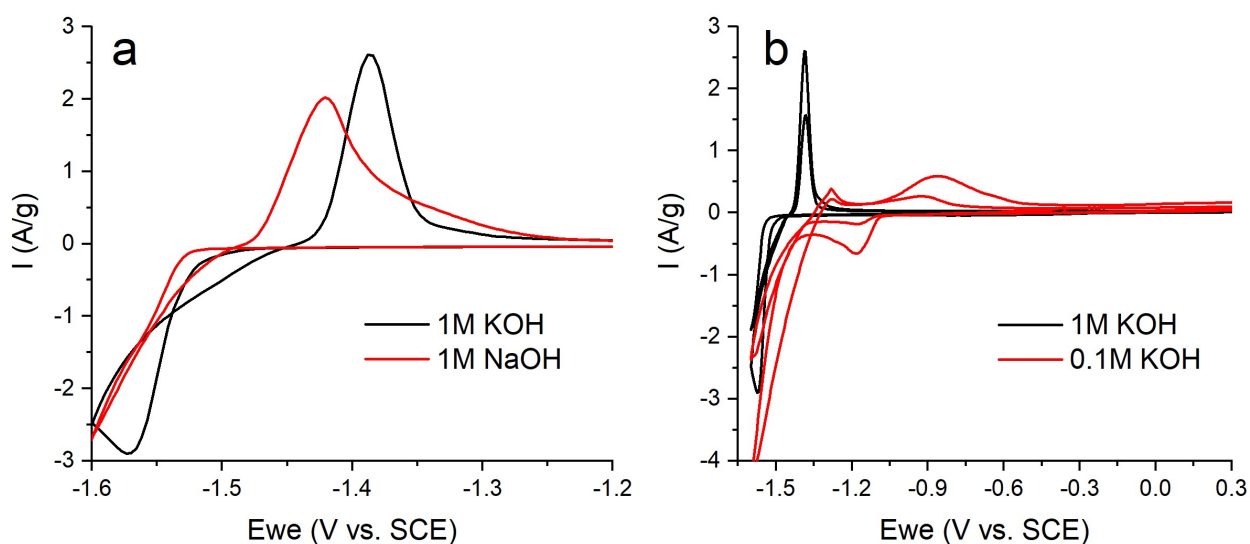

Figure S4 – CV curves of  $\text{Zn}_2(\text{EDTA})\text{H}_2\text{O}$  sample at 10 mV/s in a) 1M KOH and NaOH solution; b) 1M and 0.1 M KOH.
